# Supplementary material for: Tetraspanin 6: a pivotal protein of the multiple vesicular body determining exosome release and lysosomal degradation of amyloid precursor protein fragments
Source: PubMed Central journal article supplement (PMC5345265; doi:10.1186/s13024-017-0165-0), 2017-03-10

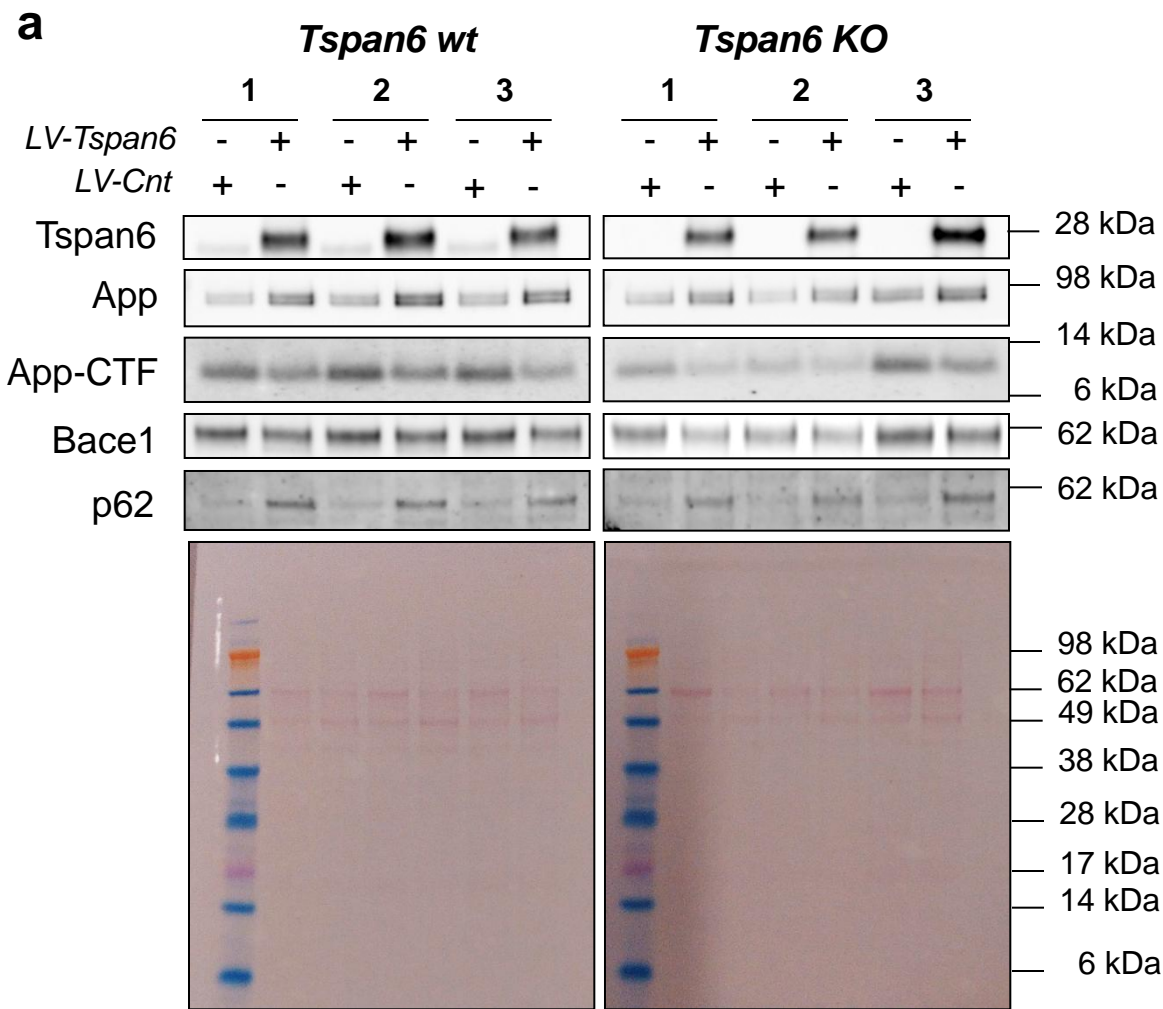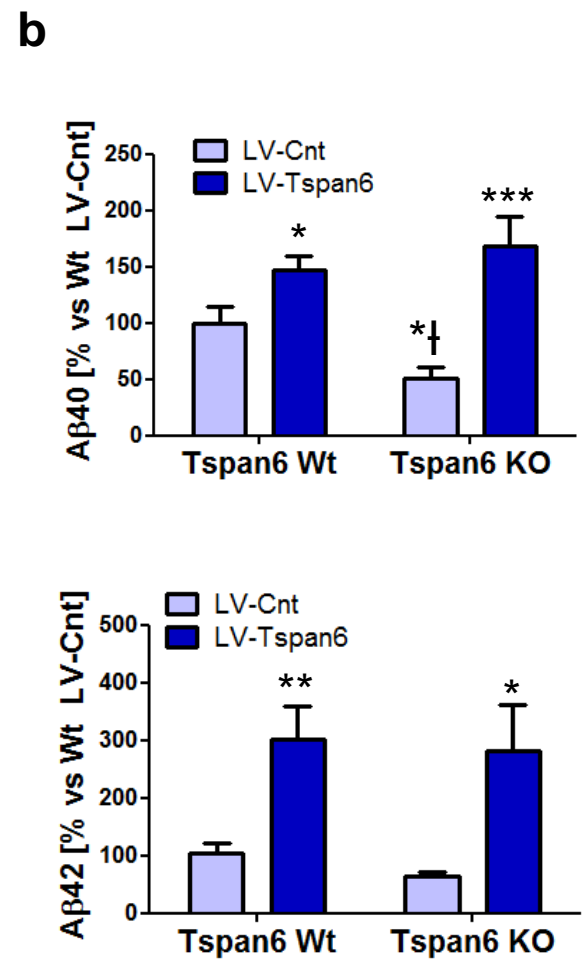

Supplement: 13024_2017_165_MOESM7_ESM.pdf [file 13024_2017_165_MOESM7_ESM.pdf]
