# Supplementary material for: Tetraspanin 6: a pivotal protein of the multiple vesicular body determining exosome release and lysosomal degradation of amyloid precursor protein fragments
Source: Springer Nature journal article supplement (doi:10.1186/s13024-017-0165-0), 2017-03-09

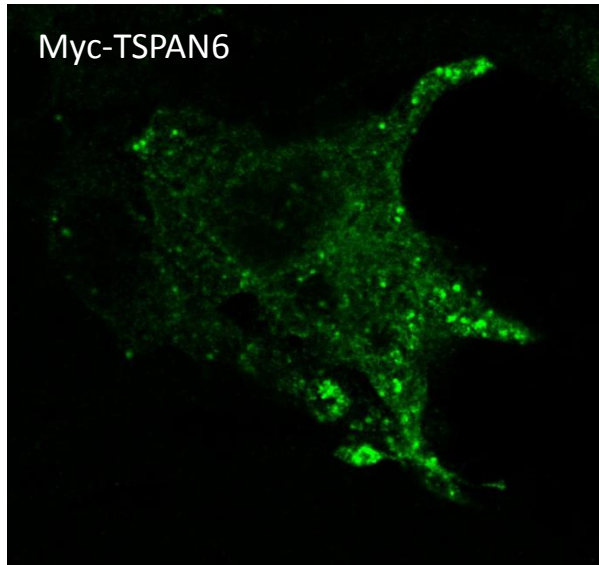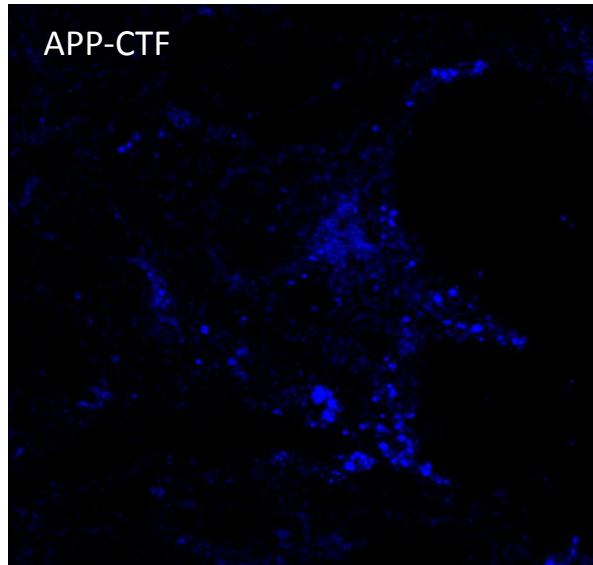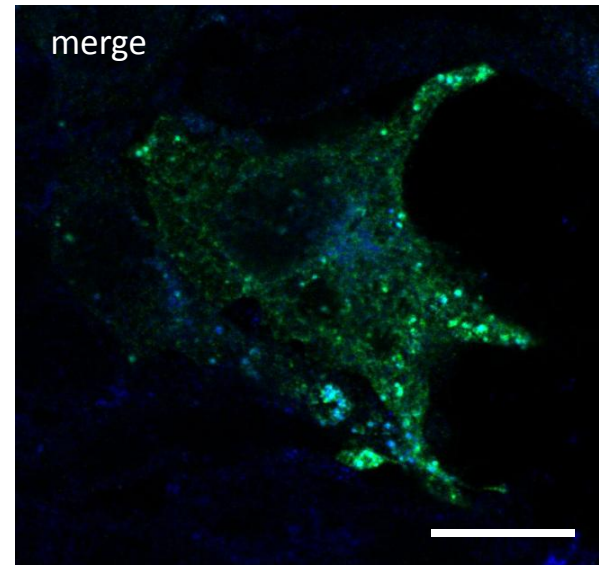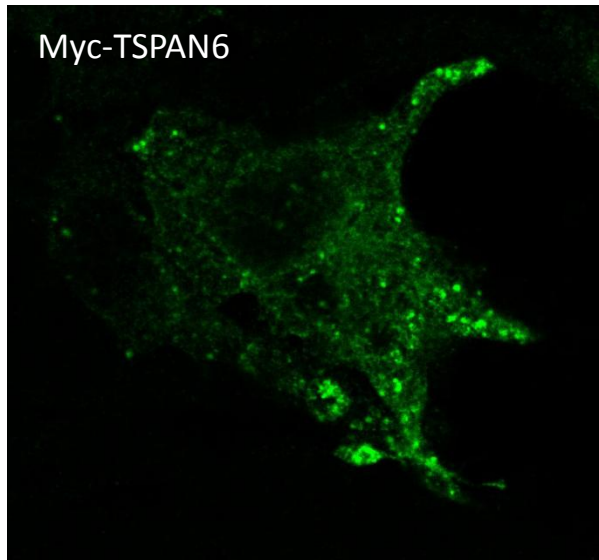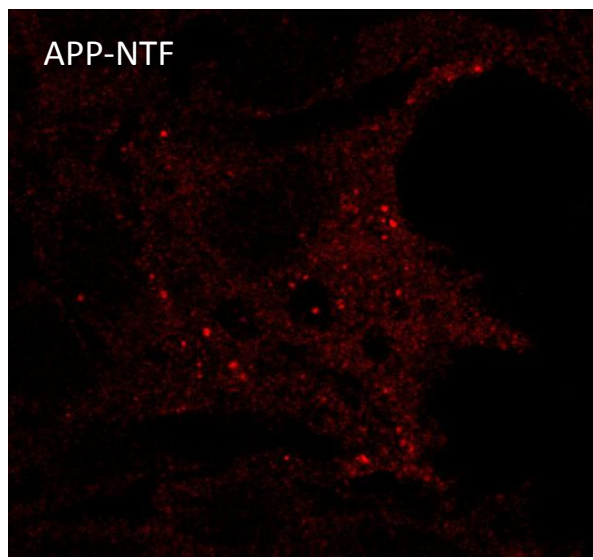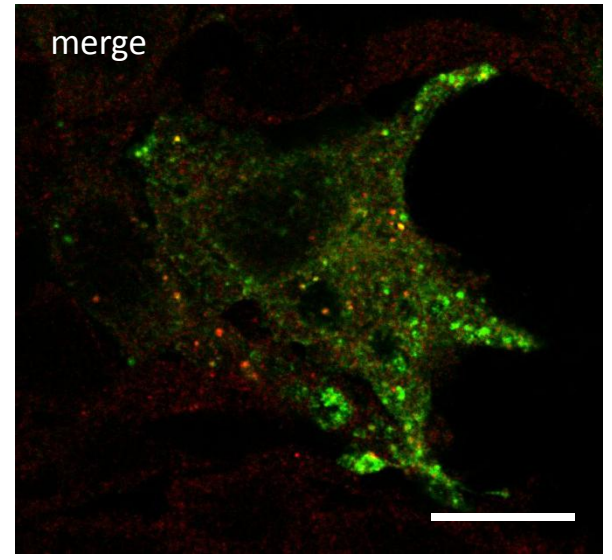

Supplement: MOESM3 [file 12132108]
