# Supplementary material for: Tetraspanin 6: a pivotal protein of the multiple vesicular body determining exosome release and lysosomal degradation of amyloid precursor protein fragments
Source: Springer Nature journal article supplement (doi:10.1186/s13024-017-0165-0), 2017-03-09

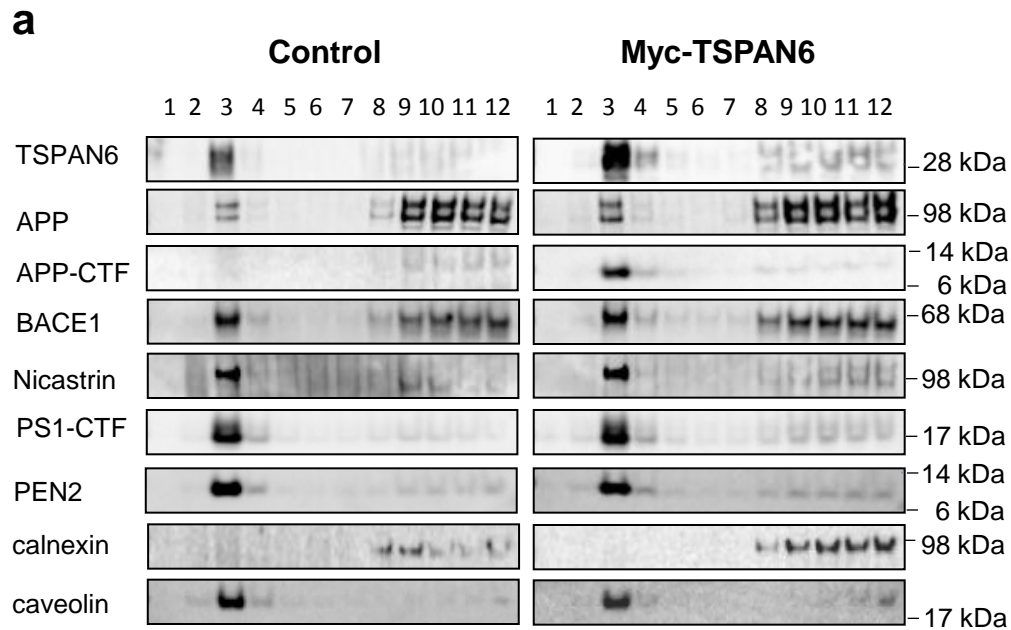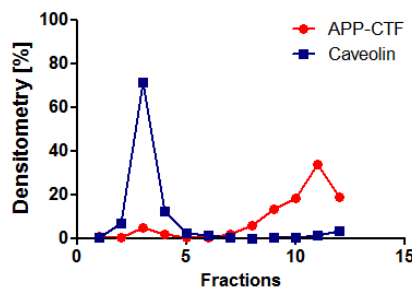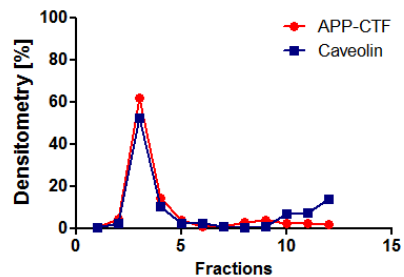

**b**

**PLA assay**

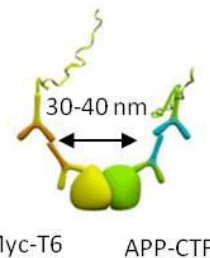

myc-TSPAN6

Vector

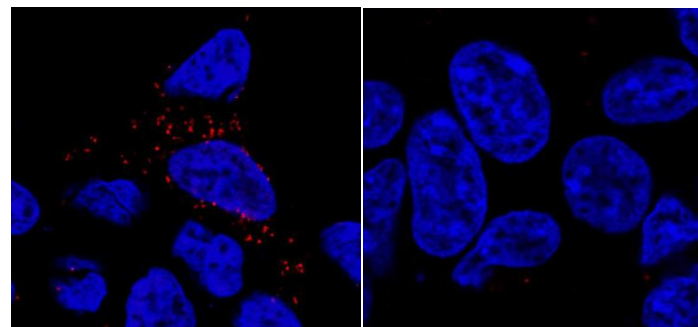

Supplement: MOESM4 [file 12132108]
